# Supplementary material for: Genome-Wide Classification of Myb Domain-Containing Protein Families in Entamoeba invadens
Source: MDPI journal article supplement (doi:10.3390/genes15020201), 2024-02-02
Supplement: s1 [file s1]

Supplementary Table S2. EiMyb proteins of *E. invadens* named and classified according to their homology to *H. sapiens* and *A. thaliana*

| 1R-MYBS            |             |           |      |               |         |                                              |                                                            |                                               |                                    |                                  |                       |
|--------------------|-------------|-----------|------|---------------|---------|----------------------------------------------|------------------------------------------------------------|-----------------------------------------------|------------------------------------|----------------------------------|-----------------------|
| Group              | Gene ID     | Gene (pb) | mRNA | Protein name  | DBD-MYB | InterProScan domains                         | CD-Search domains                                          | <i>H. sapiens</i><br>c-Myb                    | <i>A. thaliana</i> <sup>a</sup>    | <i>E. histolytica</i>            | OrthoMCL <sup>b</sup> |
| TRF-like           | EIN_023650  | 1290      | 1290 | EiTRF-like I  | 348-392 | Telomeric Repeat Binding Factor 1// TM Helix | SANT_TRF/SANT Superfamily                                  | 29.07%<br>7e-12<br>29.90%<br>3e-17<br>(TERF1) | 48.08%<br>3e-13<br>(CAD531509.1)   | 49.89%<br>5e-133<br>(EHI_148140) | OG6_105798            |
|                    | EIN_079420  | 1404      | 1404 | EiTRF-like II | 378-422 | Telomeric Repeat Binding Factor 1// TM Helix | SANT_TRF/SANT Superfamily                                  | 26.32%<br>4e-14<br>35.87<br>8e-17<br>(TERF1)  | 21.54%<br>2e-15<br>(OAP03200.1)    | 55.13%<br>5e-164<br>(EHI_001110) | OG6_105798            |
| CCA-like (SHAQKYF) | EIN_086260  | 540       | 540  | EiMybS1       | 48-92   | Myb-DNA Binding/SANT Superfamily             | Myb-DNA Binding/SANT Superfamily/RSC8 Chromatin remodeling | 22.95%<br>4e-14                               | 64.71%<br>6e-25<br>(AAF23291.1)    | 63.10%<br>2e-45<br>(EHI_092160)  | OG6_204742            |
|                    | EIN_087120  | 537       | 537  | EiMybS2       | 46-90   | Myb-DNA Binding/SANT Superfamily             | Myb-DNA Binding/SANT Superfamily                           | 21.92%<br>1e-14                               | 45.37%<br>6e-22<br>(AAF81310.1)    | 52.43%<br>2e-35<br>(EHI_092160)  | OG6_204742            |
|                    | EIN_031250* | 601       | 534  | EiMybS3       | 41-85   | Myb-DNA Binding/SANT Superfamily             | Myb-DNA Binding/SANT Superfamily                           | 25.45%<br>2e-14                               | 58.06%<br>6e-20<br>(OAP07468.1)    | 54.55%<br>4e-35<br>(EHI_136420)  | OG6_167769            |
|                    | EIN_095950  | 519       | 519  | EiMybS4       | 83-133  | Myb-DNA Binding/SANT Superfamily             | SANT Superfamily                                           | 16.13%<br>1e-11                               | 20.83%<br>3e-12<br>(CAA0383923.1)  | 38.22%<br>1e-18<br>(EHI_155580)  | OG6_127050            |
|                    | EIN_224050  | 516       | 516  | EiMybS5       | 83-133  | Myb-DNA Binding/SANT Superfamily             | SANT Superfamily                                           | 25.64%<br>2e-09                               | 27.78%<br>7e-12<br>(NP_00107786.1) | 39.10%<br>6e-17<br>(EHI_155580)  | OG6_127050            |

|             |             |      |      |                 |         |                                                      |                                                                                             |                      |                                     |                                  |            |
|-------------|-------------|------|------|-----------------|---------|------------------------------------------------------|---------------------------------------------------------------------------------------------|----------------------|-------------------------------------|----------------------------------|------------|
|             | EIN_020720  | 438  | 438  | EiMybS6         | 56-106  | Myb-DNA Binding/SANT Superfamily                     | SANT Superfamily                                                                            | -                    | 24.29%<br>2e-12<br>(CAA0367555.1)   | 62.02%<br>5e-36<br>(EHI_051440)  | OG6_204588 |
|             | EIN_469690  | 399  | 399  | EiMybS7         | 41-91   | Myb-DNA Binding/SANT Superfamily                     | SANT Superfamily                                                                            | -                    | 21.51%<br>4e-16<br>(AAM63125.1)     | 59.84%<br>5e-38<br>(EHI_051440)  | OG6_204588 |
|             | EIN_081930  | 408  | 408  | EiMybS8         | 45-95   | Myb-DNA Binding/SANT Superfamily                     | SANT Superfamily                                                                            | -                    | 29.63%<br>5e-14<br>(CAA0198797.1)   | 51.88%<br>1e-33<br>(EHI_013340)  | OG6_204588 |
|             | EIN_407300  | 546  | 546  | EiMybS9         | 88-138  | Myb-DNA Binding/SANT Superfamily                     | SANT Superfamily                                                                            | 23.64 %<br>3e-11     | 19.77%<br>5e-12<br>(NP_001330337.1) | 46.92%<br>6e-19<br>(EHI_038640)  | OG6_127050 |
| Ada2-like   | EIN_359680* | 1229 | 993  | EiAda2-Like 1   | 66-108  | ADA2-like ZZ                                         | Histone acetyltransferase complex SAGA/ADA, subunit ADA2 [Chromatin structure and dynamics] | 18.75%<br>3e-13      | 30.59%<br>1e-62<br>(CAD5328117.1)   | 64.85%<br>9e-146<br>(EHI_142140) | OG6_100940 |
|             | EIN_390470  | 1032 | 1032 | EiAda2-like 2   | 74-116  | ADA2-like ZZ                                         | Histone acetyltransferase complex SAGA/ADA, subunit ADA2 [Chromatin structure and dynamics] | 20.83%<br>1e-09      | 34.38%<br>2e-60<br>(CAD5328118.1)   | 46.86%<br>9e-92<br>(EHI_142140)  | OG6_100940 |
| Myb-related | EIN_020090  | 423  | 423  | EiMyb-related 1 | 47-91   | Myb-DNA Binding/SANT Superfamily                     | Myb-DNA Binding/SANT Superfamily                                                            | 29.1%<br>4e-17       | 32%<br>4e-18<br>(NP_201038.1)       | 25.00%<br>6e-19<br>(EHI_009930)  | OG6_100129 |
| Zuotin      | EIN_182440* | 1658 | 1596 | EiZuotin-like   | 472-521 | DNAJ domain                                          | ZUO1 Superfamily / SANT Superfamily                                                         | 16.26%<br>2e-21      | 30.24%<br>2e-29<br>(AAG51437.1)     | 52.35%<br>8e-62<br>(EHI_128200)  | OG6_102149 |
| Bdp1-like   | EIN_223710  | 366  | 366  | EiBdp1-like 1   | 45-111  | Transcription factor TFIIIB component B', Myb domain | SANT/Myb-like DNA-binding domain-containing protein                                         | -<br>28.95%<br>0.017 | 31.58%<br>8e-05<br>(CAB43631.1)     | 34.29%<br>2e-10<br>(EHI_074810)  | OG6_105326 |

|         |            |     |     |               |        |                                                            |                                                                              |                                |                                     |                                 |            |
|---------|------------|-----|-----|---------------|--------|------------------------------------------------------------|------------------------------------------------------------------------------|--------------------------------|-------------------------------------|---------------------------------|------------|
| TFIIIB  |            |     |     |               |        |                                                            |                                                                              |                                |                                     |                                 |            |
| I       | EIN_034860 | 363 | 363 | EiBdp1-like 2 | 48-110 | Transcription factor<br>TFIIIB component B",<br>Myb domain | SANT/Myb-like DNA-<br>binding domain-<br>containing protein                  | -<br>30.88%<br>5e-20<br>TFIIIB | 25.69%<br>4e-20<br>(CAD5330371.1)   | ND                              | OG6_105326 |
|         | EIN_314460 | 522 | 522 | EiBdp1-like 3 | 84-126 | Transcription factor<br>TFIIIB component B",<br>Myb domain | SANT/Myb-like DNA-<br>binding domain-<br>containing protein                  | 17.65%<br>6e-15                | 23.70%<br>5e-20<br>(CAD5330371.1)   | 65.68%<br>3e-37<br>(EHI_009820) | OG6_501849 |
|         | EIN_096130 | 312 | 312 | EiBdp1-like 4 | 30-90  | Transcription factor<br>TFIIIB component B",<br>Myb domain | BDP1 super family                                                            | -                              | 30.77%<br>3e-06<br>(CAB43631.1)     | 40.59%<br>3e-12<br>(EHI_009820) | OG6_501849 |
|         | EIN_059360 | 474 | 474 | EiBdp1-like 5 | 74-151 | Transcription factor<br>TFIIIB component B",<br>Myb domain | SANT/Myb domain                                                              | -                              | 25%<br>3e-24<br>(NP_001190961.1)    | 30%<br>5e-19<br>(EHI_009820)    | OG6_501849 |
| 2R-MYBS |            |     |     |               |        |                                                            |                                                                              |                                |                                     |                                 |            |
| I       | EIN_284910 | 519 | 519 | EiMyb1        | 28-121 | Myb-DNA Binding/SANT<br>Superfamily                        | Transcription repressor<br>MYB5; Provisional                                 | 33.63%<br>6e-44                | 34.35%<br>1e-42<br>(NP_001330339.1) | 42.55%<br>2e-43<br>(EHI_063550) | OG6_100129 |
|         | EIN_178740 | 531 | 531 | EiMyb2        | 26-119 | Myb-DNA Binding/SANT<br>Superfamily                        | Transcription repressor<br>MYB5; Provisional                                 | 30.89%<br>4e-46                | 33.33%<br>1e-43<br>(NP_190575.1)    | 42.25%<br>1e-39<br>(EHI_063550) | OG6_100129 |
| -       | EIN_047330 | 474 | 474 | EiMyb3        | 18-112 | Myb-DNA Binding/SANT<br>Superfamily                        | SANT DNA binding<br>domain / Transcription<br>repressor MYB5;<br>Provisional | 38.39%<br>2e-40                | 31.45%<br>2e-42<br>(NP_190575.1)    | 35.26%<br>1e-41<br>(EHI_063550) | OG6_100129 |
|         | EIN_206260 | 450 | 450 | EiMyb4        | 16-110 | Myb-DNA Binding/SANT<br>Superfamily                        | PLN03091 super family<br>hypothetical protein;<br>Provisional                | 34.17%<br>6e-45                | 35.42%<br>1e-45<br>(NP_190575.1)    | 34.09%<br>6e-41<br>(EHI_063550) | OG6_100129 |

|    |             |     |     |         |        |                                  |                                                               |                 |                                  |                                 |            |
|----|-------------|-----|-----|---------|--------|----------------------------------|---------------------------------------------------------------|-----------------|----------------------------------|---------------------------------|------------|
| II | EIN_169560  | 438 | 438 | EiMyb5  | 14-109 | Myb-DNA Binding/SANT Superfamily | REB1 superfamily                                              | 25.19%<br>1e-44 | 37.93%<br>5e-43<br>(NP_190575.1) | 37.40%<br>1e-37<br>(EHI_063550) | OG6_100129 |
|    | EIN_168610  | 447 | 447 | EiMyb6  | 16-110 | Myb-DNA Binding/SANT Superfamily | PLN03091 super family<br>hypothetical protein;<br>Provisional | 27.83%<br>1e-42 | 37.93%<br>5e-43<br>(NP_190575.1) | 39.69%<br>1e-37<br>(EHI_098070) | OG6_100129 |
|    | EIN_207200  | 447 | 447 | EiMyb7  | 17-79  | Myb-DNA Binding/SANT Superfamily | REB1 superfamily                                              | 29.29%<br>4e-45 | 36.36%<br>1e-44<br>(NP_190575.1) | 42.34%<br>5e-41<br>(EHI_098070) | OG6_100129 |
|    | EIN_022390  | 495 | 495 | EiMyb8  | 29-122 | Myb-DNA Binding/SANT Superfamily | REB1 superfamily                                              | 31.03%<br>5e-46 | 30.71%<br>4e-43<br>(NP_190575.1) | 42.31%<br>2e-39<br>(EHI_063550) | OG6_100129 |
|    | EIN_080130  | 504 | 504 | EiMyb9  | 23-114 | Myb-DNA Binding/SANT Superfamily | REB1 superfamily                                              | 32.65%<br>4e-46 | 33.10%<br>1e-41<br>(NP_190575.1) | 38.40%<br>2e-40<br>(EHI_063550) | OG6_100129 |
|    | EIN_276810* | 754 | 702 | EiMyb10 | 31-124 | Myb-DNA Binding/SANT Superfamily | Transcription repressor<br>MYB5; Provisional                  | 38.53%<br>4e-42 | 33.56%<br>6e-42<br>(NP_190575.1) | 31.48%<br>2e-38<br>(EHI_063550) | OG6_100129 |
|    | EIN_307410  | 507 | 507 | EiMyb11 | 20-113 | Myb-DNA Binding/SANT Superfamily | Transcription repressor<br>MYB5; Provisional                  | 30.58%<br>5e-46 | 31.72<br>7e-46<br>(VYS56784.1)   | 47.47%<br>4e-39<br>(EHI_063550) | OG6_100129 |
|    | EIN_307180  | 468 | 468 | EiMyb12 | 19-113 | Myb-DNA Binding/SANT Superfamily | Transcription repressor<br>MYB5; Provisional                  | 38.61%<br>5e-43 | 32.88%<br>5e-44<br>(NP_190575.1) | 40.27%<br>2e-41<br>(EHI_063550) | OG6_100129 |
|    | EIN_308550  | 468 | 468 | EiMyb13 | 19-112 | Myb-DNA Binding/SANT Superfamily | Transcription repressor<br>MYB5; Provisional                  | 38.53%<br>1e-43 | 34.04%<br>4e-43<br>(NP_190575.1) | 40.29%<br>1e-40<br>(EHI_063550) | OG6_100129 |
|    | EIN_095310  | 474 | 474 | EiMyb14 | 30-124 | Myb-DNA Binding/SANT Superfamily | PLN03091 super family<br>hypothetical protein;<br>Provisional | 37.07%<br>3e-40 | 33.87%<br>1e-40<br>(NP_195443.1) | 51.52%<br>2e-40 (EHI_153350)    | OG6_100129 |

|    |             |      |     |         |         |                                  |                                                         |                 |                                   |                                 |            |
|----|-------------|------|-----|---------|---------|----------------------------------|---------------------------------------------------------|-----------------|-----------------------------------|---------------------------------|------------|
| IV | EIN_399710* | 1119 | 918 | EiMyb15 | 161-255 | Myb-DNA Binding/SANT Superfamily | REB1 superfamily                                        | 35.66%<br>2e-43 | 34.27%<br>2e-42<br>(NP_195443.1)  | 68.29%<br>1e-48<br>(EHI_098070) | OG6_100129 |
|    | EIN_490880  | 477  | 477 | EiMyb16 | 41-140  | Myb-DNA Binding/SANT Superfamily | REB1 superfamily                                        | 38.89%<br>2e-41 | 35.83%<br>1e-42<br>(NP_195443.1)  | 39.09%<br>3e-39<br>(EHI_063550) | OG6_100129 |
|    | EIN_310240  | 444  | 444 | EiMyb17 | 31-125  | Myb-DNA Binding/SANT Superfamily | REB1 superfamily                                        | 45.05%<br>4e-44 | 36.36%<br>3e-44<br>(NP_195443.1)  | 44.25%<br>9e-40<br>(EHI_098070) | OG6_100129 |
|    | EIN_425380  | 486  | 486 | EiMyb18 | 32-124  | Myb-DNA Binding/SANT Superfamily | Transcription repressor MYB5; Provisional               | 28.93%<br>1e-43 | 33.05%<br>6e-42<br>(OAO92063.1)   | 44.14%<br>4e-35<br>(EHI_098070) | OG6_100129 |
|    | EIN_046410  | 504  | 504 | EiMyb19 | 39-132  | Myb-DNA Binding/SANT Superfamily | REB1 superfamily                                        | 34.58%<br>2e-43 | 34.91%<br>1e-41<br>(OAO92063.1)   | 51.25%<br>3e-47<br>(EHI_063550) | OG6_100129 |
| V  | EIN_183110  | 456  | 456 | EiMyb20 | 31-124  | Myb-DNA Binding/SANT Superfamily | PLN03091 super family hypothetical protein; Provisional | 33.07%<br>4e-46 | 37.01%<br>3e-46<br>(VYS56784.1)   | 38.84%<br>1e-38<br>(EHI_098070) | OG6_106827 |
|    | EIN_183730  | 459  | 459 | EiMyb21 | 31-124  | Myb-DNA Binding/SANT Superfamily | PLN03091 super family hypothetical protein; Provisional | 38.10%<br>2e-42 | 33.08%<br>2e-42<br>(CAA0401764.1) | 64.10%<br>2e-39<br>(EHI_130060) | OG6_106827 |
|    | EIN_169190  | 453  | 453 | EiMyb22 | 15-108  | Myb-DNA Binding/SANT Superfamily | Transcription repressor MYB5; Provisional               | 29.82%<br>2e-41 | 35.77%<br>2e-41<br>(AAS58517.1)   | 46.48%<br>7e-39<br>(EHI_168310) | OG6_100129 |
|    | EIN_359630  | 453  | 453 | EiMyb23 | 29-122  | Myb-DNA Binding/SANT Superfamily | PLN03091 super family hypothetical protein; Provisional | 35.45%<br>4e-43 | 39.05%<br>2e-42<br>(CAA0383923.1) | 57.58%<br>4e-44<br>(EHI_129790) | OG6_106827 |
|    | EIN_379820  | 453  | 453 | EiMyb24 | 29-122  | Myb-DNA Binding/SANT Superfamily | PLN03091 super family hypothetical protein; Provisional | 34.43%<br>5e-44 | 32.41%<br>1e-43<br>(VYS56784.1)   | 53.62%<br>5e-42<br>(EHI_129790) | OG6_106827 |

|           |            |      |      |               |            |                                  |                                                         |                                                 |                                         |                                  |            |
|-----------|------------|------|------|---------------|------------|----------------------------------|---------------------------------------------------------|-------------------------------------------------|-----------------------------------------|----------------------------------|------------|
| -         | EIN_168860 | 495  | 495  | EiMyb25       | 29-126     | Myb-DNA Binding/SANT Superfamily | PLN03091 super family hypothetical protein; Provisional | 29.13%<br>9e-46                                 | 33.93%<br>3e-42<br>(CAD5329766.1)       | 46.23%<br>1e-32<br>(EHI_092700)  | OG6_106827 |
| -         | EIN_405040 | 615  | 615  | EiMyb26       | 65-458     | Myb-DNA Binding/SANT Superfamily | REB1 superfamily                                        | 28.23%<br>4e-40                                 | 30.86%<br>1e-43<br>(AAS58517.1)         | 43.37%<br>5e-36<br>(EHI_053000)  | OG6_100129 |
| -         | EIN_248780 | 714  | 714  | EiCDC5-like   | 10-102     | CDC5L_II                         |                                                         | 22.78%<br>5e-39<br>58.71%<br>8e-41<br>(CDC5)    | 53.45%<br>2e-55<br>(OAP18307.1<br>CDC5) | 78.48%<br>2e-22<br>(EHI_000550)  | OG6_102607 |
| 4R-MYBS   |            |      |      |               |            |                                  |                                                         |                                                 |                                         |                                  |            |
| SNAP-like | EIN_267690 | 1992 | 1992 | EiSNAP-like I | R1 436-599 | SANT/Myb domain                  | SANT/Myb domain                                         | 28.22%<br>2e-11<br>39.08%<br>7e-08<br>(SNAP190) |                                         | 29.97%<br>1e-185<br>(EHI_130710) | OG6_501849 |

\* Intron containing MYB-DBDs encoded genes; - No identity found against *H. sapiens* c-Myb; ND No identity found against *E. histolytica* genome.

<sup>a</sup> Accession number according to NCBI (<https://www.ncbi.nlm.nih.gov/>) <sup>b</sup> According to OrthoMCL DB.
