# Supplementary material for: Genome-Wide Classification of Myb Domain-Containing Protein Families in Entamoeba invadens
Source: MDPI journal article supplement (doi:10.3390/genes15020201), 2024-02-02
Supplement: s1 [file s1]

**Supplementary Table S1. Characteristics of all the full length EiMyb proteins of *Entamoeba invadens* classified according to their repeat number**

|        | No | Gene ID    | Annotation                                     | Size (aa) | MW (kDa) | pI    | TH <sup>a</sup> | Subcellular localization <sup>b</sup> | NLS1 sequence      | NLS1 Description           | NLS2 sequence     | NLS2 Description          |
|--------|----|------------|------------------------------------------------|-----------|----------|-------|-----------------|---------------------------------------|--------------------|----------------------------|-------------------|---------------------------|
| 1R-Myb | 1  | EIN_020090 | Hypothetical protein                           | 140       | 16.37    | 9.45  | -               | N                                     | KKRK               | Monopartite of 4 residues  |                   |                           |
|        | 2  | EIN_020720 | Hypothetical protein                           | 145       | 17.01    | 9.42  | -               | C, N                                  | KKKK               | Monopartite of 4 residues  |                   |                           |
|        | 3  | EIN_023650 | Hypothetical protein                           | 429       | 49.25    | 7.52  | Y               | C, N                                  | KKKKRR             | Monopartite of 6 residues  |                   |                           |
|        | 4  | EIN_031250 | Hypothetical protein                           | 177       | 20.26    | 9.88  | -               | N                                     | KKVRKQYTLTXRRR     | Monopartite of 14 residues |                   |                           |
|        | 5  | EIN_034860 | Hypothetical protein                           | 120       | 14.39    | 9.51  | -               | C, N                                  | KKPKVQQRKEDLKPRK   | Bipartite of 17 residues   |                   |                           |
|        | 6  | EIN_059360 | Hypothetical protein                           | 157       | 18.17    | 8.87  | -               | C, E                                  | -                  |                            |                   |                           |
|        | 7  | EIN_079420 | Hypothetical protein                           | 467       | 53.12    | 8.4   | Y               | N                                     | PKKAKTT            | Monopartite of 7 residues  | KKKKRR            | Monopartite of 6 residues |
|        | 8  | EIN_081930 | Hypothetical protein                           | 135       | 15.75    | 9.51  | -               | C, N                                  | -                  |                            |                   |                           |
|        | 9  | EIN_086260 | Hypothetical protein                           | 179       | 20.87    | 10.13 | -               | N                                     | RKQRKQYTITXXKKREV  | Bipartite of 17 residues   |                   |                           |
|        | 10 | EIN_087120 | Hypothetical protein                           | 178       | 20.64    | 9.69  | -               | N                                     | RKQRKQYTITXXKKREV  | Bipartite of 17 residues   |                   |                           |
|        | 11 | EIN_095950 | Hypothetical protein                           | 172       | 20.19    | 9.19  | -               | C, N                                  | -                  |                            |                   |                           |
|        | 12 | EIN_096130 | Hypothetical protein                           | 103       | 12.13    | 9.27  | -               | C, N                                  | -                  |                            |                   |                           |
|        | 13 | EIN_182440 | Hypothetical protein                           | 531       | 62.75    | 8.63  | -               | C, N                                  | RRWMNKENEKTTKLRRK  | Bipartite of 17 residues   | KRIWRLAELAXHKKDPR | Bipartite of 17 residues  |
|        | 14 | EIN_223710 | Hypothetical protein                           | 121       | 14.47    | 9.42  | -               | C, N                                  | RKRHK              | Monopartite of 5 residues  |                   |                           |
|        | 15 | EIN_224050 | Hypothetical protein                           | 171       | 20.08    | 9.71  | -               | C, N                                  | -                  |                            |                   |                           |
|        | 16 | EIN_314460 | Hypothetical protein                           | 173       | 20.08    | 8.94  | -               | C, N                                  | KRVVAKPRKSXXXKKWDK | Bipartite of 17 residues   |                   |                           |
|        | 17 | EIN_359680 | transcriptional adapter, putative              | 330       | 38.84    | 6.45  | -               | C, N                                  | KRLEQYYKMYIERIRVR  | Bipartite of 17 residues   | RREGCLTMEEXTKERRR | Bipartite of 17 residues  |
|        | 18 | EIN_390470 | transcriptional adapter, putative              | 343       | 40.46    | 7.55  | -               | C, N                                  | RKLERYTKMCLERKRIR  | Bipartite of 17 residues   | RKGAKGAKAAXHKGGKK | Bipartite of 17 residues  |
|        | 19 | EIN_407300 | Hypothetical protein                           | 181       | 20.76    | 6.35  | -               | C, N                                  | -                  |                            |                   |                           |
|        | 20 | EIN_469690 | Hypothetical protein                           | 132       | 15.58    | 9.61  | -               | C, N                                  | PEIRRKV            | Monopartite of 7 residues  |                   |                           |
| 2R-Myb | 21 | EIN_022390 | transcription factor MYB90, putative           | 164       | 18.72    | 9.53  | -               | N                                     | KRSQNNKENAXXLKKKL  | Bipartite of 17 residues   |                   |                           |
|        | 22 | EIN_046410 | MYB, putative                                  | 167       | 19.62    | 9.67  | -               | N                                     | -                  |                            |                   |                           |
|        | 23 | EIN_047330 | transcription factor WEREWOLF, putative        | 157       | 18.22    | 9.8   | -               | N                                     | KHKK               | Monopartite of 4 residues  | PGRTRKQ           | Monopartite of 7 residues |
|        | 24 | EIN_080130 | trichome differentiation protein GL1, putative | 167       | 19.42    | 8.77  | -               | N                                     | PNRTKKQ            | Monopartite of 7 residues  |                   |                           |
|        | 25 | EIN_095310 | transcription factor MYB75, putative           | 157       | 17.97    | 9.8   | -               | N                                     | PGRTRKQ            | Monopartite of 7 residues  |                   |                           |
|        | 26 | EIN_168610 | trichome differentiation protein GL1, putative | 148       | 17.49    | 9.58  | -               | N                                     | KKIEIFVVGRXNRKQCR  | Bipartite of 17 residues   |                   |                           |
|        | 27 | EIN_168860 | transcription factor MYB59, putative           | 164       | 19.5     | 9.32  | -               | N                                     | RKKRK              | Monopartite of 5 residues  |                   |                           |

|        |    |            |                                                |     |       |       |   |      |                    |                           |                   |                           |
|--------|----|------------|------------------------------------------------|-----|-------|-------|---|------|--------------------|---------------------------|-------------------|---------------------------|
|        | 28 | EIN_169190 | C-MYB, putative                                | 150 | 17.64 | 9.77  | - | N    | -                  |                           |                   |                           |
|        | 29 | EIN_169560 | r2r3-MYB transcription factor, putative        | 145 | 17.21 | 9.79  | - | N    | KKVEKNIKGRXNRKQCR  | Bipartite of 17 residues  | KRPWTIEEDQTIMKTRK | Bipartite of 17 residues  |
|        | 30 | EIN_178740 | transcription factor WEREWOLF, putative        | 176 | 20.68 | 9.78  | - | N    | KRANSKTKEVXXXKQKEK | Bipartite of 17 residues  |                   |                           |
|        | 31 | EIN_183110 | transcription factor MYB23, putative           | 151 | 17.41 | 9.75  | - | N    | HKKK               | Monopartite of 4 residues |                   |                           |
|        | 32 | EIN_183730 | Hypothetical protein                           | 152 | 17.52 | 9.37  | - | N    | PVSKRPR            | Monopartite of 7 residues |                   |                           |
|        | 33 | EIN_206260 | trichome differentiation protein GL1, putative | 149 | 17.42 | 9.47  | - | N    | KKVELFVPKRXNRKQCR  | Bipartite of 17 residues  |                   |                           |
|        | 34 | EIN_207200 | transcription factor MYB23, putative           | 148 | 17.55 | 9.11  | - | N    | KHKK               | Monopartite of 4 residues | PERTKKQ           | Monopartite of 7 residues |
|        | 35 | EIN_248780 | transcription factor MYB23, putative           | 237 | 27.3  | 9.52  | - | N    | -                  |                           |                   |                           |
|        | 36 | EIN_276810 | Hypothetical protein                           | 233 | 27.58 | 9.87  | - | N    | PNRTKKQ            | Monopartite of 7 residues |                   |                           |
|        | 37 | EIN_284910 | transcription factor WEREWOLF, putative        | 172 | 19.87 | 9.73  | - | N    | KKKK               | Monopartite of 4 residues | PNRSRKQ           | Monopartite of 7 residues |
|        | 38 | EIN_307180 | transcription factor MYB48, putative           | 155 | 18.55 | 9.77  | - | N    | KRAWTQEEDDXIIMKRR  | Bipartite of 17 residues  |                   |                           |
|        | 39 | EIN_307410 | transcription factor MYB90, putative           | 168 | 19.84 | 9.77  | - | N    | KRAWTQEEDDXIIMKRR  | Bipartite of 17 residues  |                   |                           |
|        | 40 | EIN_308550 | transcription factor MYB75, putative           | 155 | 18.46 | 9.68  | - | N    | KRAWTQEEDDXIIMKRR  | Bipartite of 17 residues  |                   |                           |
|        | 41 | EIN_310240 | transcription factor MYB23, putative           | 147 | 17.13 | 9.72  | - | N    | PFKKKYS            | Monopartite of 7 residues | PSRTRKQ           | Monopartite of 7 residues |
|        | 42 | EIN_359630 | trichome differentiation protein GL1           | 150 | 17.29 | 9.68  | - | N    | -                  |                           |                   |                           |
|        | 43 | EIN_379820 | trichome differentiation protein GL1, putative | 150 | 17.32 | 10.08 | - | N    | -                  |                           |                   |                           |
|        | 44 | EIN_399710 | Hypothetical protein                           | 305 | 36.47 | 9.88  | - | N    | KKGAHLLIIFQSKKKVK  | Bipartite of 17 residues  | RRWHLVALKIXPSRTRK | Bipartite of 17 residues  |
|        | 45 | EIN_405040 | trichome differentiation protein GL1, putative | 204 | 23.3  | 6.18  | - | N    | KRKK               | Monopartite of 4 residues |                   |                           |
|        | 46 | EIN_425380 | transcription factor MYB48, putative           | 161 | 18.6  | 9.34  | - | N    | -                  |                           |                   |                           |
|        | 47 | EIN_490880 | r2r3-MYB transcription factor, putative        | 158 | 18.42 | 9.46  | - | N    | KKKK               | Monopartite of 4 residues | PGRSRKQ           | Monopartite of 7 residues |
| 4R-Myb | 48 | EIN_267690 | snap190, putative                              | 663 | 77.44 | 7.47  | - | C, N | -                  |                           |                   |                           |

<sup>a</sup> -, non detected; y, yes

<sup>b</sup> C, cytoplasm; n, nucleus; E, extracellular
